# Supplementary material for: Peptide-substituted phthalocyanine photosensitizers: design, synthesis, photophysicochemical and photobiological studies
Source: Royal Society of Chemistry journal article supplement (doi:10.1039/c6pp00231e), 2016-09-12
Supplement: c6pp00231e1.pdf [file c6pp00231e1.pdf]

## SUPPLEMENTARY INFORMATION

# **Peptide-substituted phthalocyanine photosensitizers: design, synthesis, photophysicochemical and photobiological studies**

Meltem Göksel<sup>a,b</sup>, Mahmut Durmuş<sup>a</sup>, Devrim Atilla<sup>a\*</sup>

*<sup>a</sup>Kocaeli University, Kosekoy Vocational School, P.O. Box 141, Kartepe, 41135 Kocaeli,  
Turkey*

*<sup>b</sup>Gebze Technical University, Department of Chemistry, PO Box 141, Gebze, 41400 Kocaeli,  
Turkey. Email: [datilla@gtu.edu.tr](mailto:datilla@gtu.edu.tr)*

### ***Chemicals and materials***

All solvents were reagent-grade quality and obtained from commercial suppliers. Column chromatography was performed on silica gel 60 (0.04–0.063 mm) and preparative thin layer chromatography (TLC) was performed on silica gel 60 P F<sub>254</sub>. 1,3-diphenylisobenzofuran (DPBF) was obtained from Fluka. Zinc phthalocyanine used as standard for photophysical and photochemical measurements was purchased from Aldrich. All reactions were monitored by TLC using 0.25 mm silica gel plates with UV indicator (60F<sub>254</sub>).

### ***Equipments***

Elemental analyses were obtained from Thermo Finnigan Flash 1112 Instrument. Infrared spectra were recorded on a Perkin Elmer Spectrum 100 spectrophotometer. Electronic absorption spectra were measured on a Shimadzu 2101 UV-Vis spectrophotometer. Fluorescence excitation and emission spectra were recorded on a Varian Eclipse spectrofluorometer using 1 cm path length cuvette at room temperature. <sup>1</sup>H and <sup>13</sup>C NMR spectra with TMS as the internal standard were recorded on a Varian 500 MHz spectrometer. The mass spectra were recorded on a MALDI (Matrix Assisted Laser Desorption Ionization) BRUKER Microflex LT using a 2,5-dihydroxybenzoic acid (DHB) as matrix.

### ***Photophysical parameters***

#### *Fluorescence quantum yields and lifetimes*

Fluorescence quantum yields ( $\Phi_F$ ) are determined in DMSO by the comparative method using by equation 1 [1, 2],

$$\Phi_F = \Phi_F(\text{Std}) \frac{F \cdot A_{\text{Std}} \cdot n^2}{F_{\text{Std}} \cdot A \cdot n_{\text{Std}}^2} \quad (1)$$

where  $F$  and  $F_{\text{Std}}$  are the areas under the fluorescence emission curves of the samples (**2**, **5**, **6**, **7**, **8**, and **9**) and the standard, respectively.  $A$  and  $A_{\text{Std}}$  are the respective absorbances of the samples and standard at the excitation wavelengths, respectively.  $n^2$  and  $n_{\text{Std}}^2$  are the refractive indices of solvents used for the sample and standard, respectively. Unsubstituted ZnPc ( $\Phi_F = 0.20$ ) [3] was employed as the standard in DMSO. The absorbance of the solutions at the excitation wavelength ranged between 0.04 and 0.05.

Natural radiative life times ( $\tau_0$ ) are determined using PhotochemCAD program [4] which uses the Strickler-Berg equation. The fluorescence lifetimes ( $\tau_F$ ) are calculated using equation 2.

$$\Phi_F = \frac{\tau_F}{\tau_0} \quad (2)$$

### ***Photochemical parameters***

#### *Singlet oxygen quantum yields*

Singlet oxygen quantum yield ( $\Phi_\Delta$ ) determinations are carried out using the experimental set-up described in literature [6] in DMSO. Typically, a 3 mL portion of the respective unsubstituted or tetra-substituted zinc (II) phthalocyanine solutions (absorbance  $\sim 1.0$  at the irradiation wavelength) containing the singlet oxygen quencher was irradiated in the Q band region with the photo-irradiation set-up described in references [6].  $\Phi_\Delta$  values were determined in air using the relative method with ZnPc (in DMSO) as standards. DPBF was used as chemical quenchers for singlet oxygen in DMSO. Equation 3 was employed for the determination of  $\Phi_\Delta$  values:

$$\Phi_{\Delta} = \Phi_{\Delta}^{\text{Std}} \frac{R \cdot I_{\text{abs}}^{\text{Std}}}{R^{\text{Std}} \cdot I_{\text{abs}}} \quad (3)$$

where  $\Phi_{\Delta}^{\text{Std}}$  is the singlet oxygen quantum yields for the standards ZnPc ( $\Phi_{\Delta}^{\text{Std}} = 0.67$  in DMSO) [7],  $R$  and  $R^{\text{Std}}$  are the DPBF photobleaching rates in the presence of the respective samples (2, 5, 6, 7, 8, and 9) and standards, respectively.  $I_{\text{abs}}$  and  $I_{\text{abs}}^{\text{Std}}$  are the rates of light absorption by the samples (2, 5, 6, 7, 8, and 9) and standards, respectively. To avoid chain reactions induced by quencher (DPBF) in the presence of singlet oxygen, the concentration of quenchers (DPBF) was lowered to  $\sim 3 \times 10^{-5}$  M [8]. Solutions of sensitizer (absorbance = 1 at the irradiation wavelength) containing quencher (DPBF) were prepared in the dark and irradiated in the Q band region. DPBF degradation at 417 nm was monitored. The light intensity  $6.21 \times 10^{15}$  photons  $\text{s}^{-1} \text{cm}^{-2}$  was used for  $\Phi_{\Delta}$  determinations.

#### *Photodegradation quantum yields*

Photodegradation quantum yield ( $\Phi_d$ ) determinations are carried out using the experimental set-up described in literature [6]. Photodegradation quantum yields were determined using equation 4 in both DMSO.

$$\Phi_d = \frac{(C_0 - C_t) \cdot V \cdot N_A}{I_{\text{abs}} \cdot S \cdot t} \quad (4)$$

where  $C_0$  and  $C_t$  are the samples concentrations before and after irradiation, respectively.  $V$  is the reaction volume,  $N_A$  the Avogadro's constant,  $S$  the irradiated cell area and  $t$  the irradiation time,  $I_{\text{abs}}$  is the overlap integral of the radiation source light intensity and the absorption of the samples. A light intensity of  $2.17 \times 10^{16}$  photons  $\text{s}^{-1} \text{cm}^{-2}$  was employed for  $\Phi_d$  determinations.

## References

- [1] S. Fery-Forgues, D. Lavabre, Are fluorescence quantum yields so tricky to measure? A demonstration using familiar stationary products, *J. Chem. Edu.* 76 (1999) 1260-1264.
- [2] D. Maree, T. Nyokong, K. Suhling, D. Phillips, Effects of axial ligands on the photophysical properties of silicon octaphenoxyphthalocyanine, *J. Porphyrins Phthalocyanines* 6 (2002) 373-376.
- [3] A. Ogunsipe, J-Y. Chen, T. Nyokong, Photophysical and photochemical studies of zinc(II) phthalocyanine derivatives—effects of substituents and solvents, *New J. Chem.* 28 (2004) 822-827.
- [4] H. Du, R.A. Fuh, J. Li, A. Corkan, J.S. Lindsey, PhotochemCAD: A computer-aided design and research tool in photochemistry, *Photochem. Photobiol.* 68 (1998) 141-142.
- [5] J. Rose, *Advanced Physico-chemical Experiments*, first ed., Sir Isaac Pitman and Sons Ltd., London, 1964, p. 257.
- [6] A. Ogunsipe, T. Nyokong, Photophysical and photochemical studies of sulphonated non-transition metal phthalocyanines in aqueous and non-aqueous media, *J. Photochem. Photobiol. A-Chem.* 173 (2005) 211-220.
- [7] N. Kuznetsova, N. Gretsova, E. Kalmkova, E. Makarova, S. Dashkevich, V. Negrimovskii, O. Kaliya, E. Luk'yanets, Relationship between the photochemical properties and structure of porphyrins and related compounds, *Russ. J. Gen. Chem.* 70 (2000) 133-140.
- [8] W. Spiller, H. Kliesch, D. Wöhrle, S. Hackbarth, B. Roder, G. Schnurpfeil, Singlet oxygen quantum yields of different photosensitizers in polar solvents and micellar solutions. *J. Porphyrins Phthalocyanines* 2 (1998) 145-158.
